# Supplementary material for: Hyperconjugation in diethyl ether cation versus diethyl sulfide cation
Source: Royal Society of Chemistry journal article supplement (doi:10.1039/c5cp03765d), 2015-01-01
Supplement: c5cp03765d1.pdf [file c5cp03765d1.pdf]

## Electronic Supplementary Information for

# Hyperconjugation in diethylether cation versus diethylsulfide cation

Masato Morita<sup>a+</sup>, Yoshiyuki Matsuda<sup>b,c\*</sup>, Tomoya Endo<sup>b</sup>, Naohiko Mikami<sup>b</sup>, Asuka Fujii<sup>b</sup> and Kaito Takahashi<sup>a\*</sup>,

*a) Institute of Atomic and Molecular Sciences, Academia Sinica, P.O.Box 23-166, Taipei, 10617 Taiwan  
R. O. C.*

*b) Department of Chemistry, Graduate School of Science, Tohoku University, Aramaki-Aoba, Aoba-ku,  
Sendai 980-8578, Japan*

*c) Institute for Excellence in Higher Education, Tohoku University,  
Kawauchi 41, Aoba-ku, Sendai, 980-8576, Japan*

\* YM: Tel: +81-22-795-6573, Email: matsuda@m.tohoku.ac.jp; KT: Tel: +886-223668237, Email: kt@gate.sinica.edu.tw

+Present address: Department of Chemistry, Durham University, South Road, Durham DH1 3LE, UK

### Material Summary:

Details concerning the energetics and multidimensional vibrational calculation; a table for the CH stretching vibration using the local mode model for neutral ag diethyl sulfide (DES); four tables comparing the LM versus LM(NM)-4D model for aa diethyl ether (DEE) and gg, gg', and sg DEE<sup>+</sup>; a table comparing the relative energies for DEE<sup>+</sup>-Ar; a figure on the two dimensional potential energy surface of DEE<sup>+</sup>; a figure of the schematic geometry of DEE<sup>+</sup>-Ar; a figure for the vibrational modes of DEE<sup>+</sup>; a figure comparing the methyl torsion angle dependence of the C3H9 stretching vibrational frequency; a figure comparing the COCH torsion angle dependence of the C3H9 stretching vibrational peak intensity; and Cartesian geometries optimized by the MP2/6-311++G(3df,3pd) method are all available in the ESI.

## Relative energies calculated by different quantum chemistry methods

In the following Tables we have summarized the relative energetics calculated by using a variety of quantum chemistry methods. As given in Table S1, for the adiabatic and vertical ionization energies for DEE<sup>+</sup>, B3LYP or PBE0 does not show basis set dependence, and both constantly underestimates the CCSD(T) values, given in the manuscript by about 0.3 eV. On the other hand, for DES<sup>+</sup>, given in Table S2, the values obtained by B3LYP/6-31++G(d,p) are very close to those obtained by the CCSD(T)//MP2 method given in the manuscript. .

Table S1: Ionization energies, in eV, of diethylether calculated using several different quantum chemistry methods. See Figure 2 in manuscript for naming of the structures.

| Method                  | gg cation <sup>a</sup> | gg' cation <sup>a</sup> | sg cation <sup>a</sup> | gg'' cation <sup>a</sup> | Vertical <sup>b</sup> |
|-------------------------|------------------------|-------------------------|------------------------|--------------------------|-----------------------|
| B3LYP/6-311++G(3df,3pd) | 9.24 (9.30)            | 9.24 (9.32)             | 9.29<br>(9.37)         |                          | 9.56                  |
| PBE0/6-31++G(d,p)       | 9.20 (9.25)            | 9.18 (9.26)             | 9.22<br>(9.29)         | 9.15 (9.26)              | 9.51                  |
| PBE0/6-311++G(3df,3pd)  | 9.21 (9.27)            | 9.19 (9.27)             | 9.16<br>(9.27)         | 9.16 (9.27)              | 9.50                  |
| MP2/6-311++G(3df,3pd)   | 9.88 (9.92)            | 9.89 (9.95)             | 9.94<br>(10.00)        | 9.91 (10.0)              | 10.18                 |

a: zero point corrected values at the respective level of calculation method, electronic energy differences are given in parentheses; b: electronic energy difference between the neutral and cationic species at the equilibrium geometry of the neutral species at the respective level;

Table S2: Ionization energies, in eV, of diethylsulfide calculated using several different quantum chemistry methods. See Figure 2 in manuscript for the naming of the structures.

| Method                  | aa cation <sup>a</sup> | ag cation <sup>a</sup> | gg cation <sup>a</sup> | Vertical <sup>a</sup> |
|-------------------------|------------------------|------------------------|------------------------|-----------------------|
| B3LYP/6-311++G(3df,3pd) | 8.28                   | 8.29                   | 8.31                   | 8.36                  |
| MP2/6-311++G(3df,3pd)   | 8.44                   | 8.44                   | 8.44                   | 8.52                  |

a: electronic energy differences at the respective level of calculation method; b: single point CCSD(T)/6-311++G(3df,3pd) energy calculation using MP2/6-311++G(3df,3pd) geometries

Table S3: Relative electronic energies, in eV, of diethylether cation alcohol isomers calculated using several different quantum chemistry methods. See Figure 8 in manuscript for naming of the structures. Zero of energy is neutral diethylether calculated at the respective levels of quantum chemistry.

| Method                  | H <sup>+</sup> transfer1 | H <sup>+</sup> transfer2 | H bonded1 | Transition State1 | Transition State2 |
|-------------------------|--------------------------|--------------------------|-----------|-------------------|-------------------|
| B3LYP/6-311++G(3df,3pd) | 9.47                     | 9.51                     | 9.18      | 10.66             | 10.83             |
| PBE0/6-31++G(d,p)       | 9.41                     | 9.44                     | 9.28      | 10.56             | 10.74             |
| PBE0/6-311++G(3df,3pd)  | 9.41                     | 9.42                     | 9.21      | 10.56             | 10.71             |
| MP2/6-311++G(3df,3pd)   | 9.55                     | 9.62                     | 9.53      | 10.97             | 11.03             |

a: single point CCSD(T)/6-311++G(3df,3pd) energy calculation using MP2/6-311++G(3df,3pd) geometries

Table S4: Relative electronic energies, in eV, of diethylsulfide cation thiol isomers calculated using B3LYP.

See ESI Figure S6 for naming of the structures. Zero of energy is neutral diethylsulfide calculated at the respective levels of quantum chemistry.

| Method                  | H <sup>+</sup><br>transfer1 | H <sup>+</sup><br>transfer2 | H bonded1 | Transition<br>State1 | Transition<br>State2 |
|-------------------------|-----------------------------|-----------------------------|-----------|----------------------|----------------------|
| B3LYP/6-311++G(3df,3pd) | 9.07                        | 9.01                        | 9.17      | 9.84                 | 10.05                |
| MP2/6-311++G(3df,3pd)   | 9.23                        | 9.22                        | 9.77      | 10.02                | 10.25                |

a: single point CCSD(T)/6-311++G(3df,3pd) energy calculation using MP2/6-311++G(3df,3pd) geometries

## Contributions coming from ag conformer of diethyl sulfide

As shown below in Table S5, the ag isomer for diethyl sulfide (DES) does not show much difference with aa DES in terms of peak positions.

Table S5: Theoretical peak position, in  $\text{cm}^{-1}$ , and intensity, in  $\text{km mol}^{-1}$ , of CH stretching vibration of neutral ag DES calculated using the local mode model with B3LYP/6-31++G(d,p). See Figure 2 in text for numbering.

| DES ag        | C2H6 | C2H7 | C3H8 | C3H9 | C4H10 | C4H11 | C4H12 | C5H13 | C5H14 | C5H15 |
|---------------|------|------|------|------|-------|-------|-------|-------|-------|-------|
| Peak position | 2976 | 2946 | 2960 | 2944 | 2959  | 2989  | 2995  | 2977  | 2990  | 2988  |
| Intensity     | 20.8 | 38.0 | 31.4 | 37.4 | 59.1  | 27.2  | 21.1  | 43.0  | 23.5  | 23.6  |

## Details of the Multidimensional vibrational calculation

Since there are several symmetrically equivalent CH bonds in DEE and DES, the intermode coupling can cause peaks to shift and split from the simple LM treatment results. Therefore, we also performed 65,536 ( $16^4$ ) single point calculations for the 4 CH bonds next to the ether oxygen for DEE and DEE<sup>+</sup>, to obtain a 4-dimensional potential energy surface (PES) and the dipole moment function (DMF). Using these functions, we performed a 4-dimensional vibrational calculation, LM-4D, to determine the extent of the coupling between the CH bonds. Using the direct product of the DVR basis we solved the following Schrödinger equation:

$$H = -\frac{\hbar^2}{2\mu_{CH}} \frac{\partial^2}{\partial R_{C2H6}^2} - \frac{\hbar^2}{2\mu_{CH}} \frac{\partial^2}{\partial R_{C2H7}^2} - \frac{\hbar^2}{2\mu_{CH}} \frac{\partial^2}{\partial R_{C3H8}^2} - \frac{\hbar^2}{2\mu_{CH}} \frac{\partial^2}{\partial R_{C3H9}^2} \\ - \frac{\cos(\angle H6C2H7)}{M_C} \frac{\partial}{\partial R_{C2H6}} \frac{\partial}{\partial R_{C2H7}} - \frac{\cos(\angle H8C3H9)}{M_C} \frac{\partial}{\partial R_{C3H8}} \frac{\partial}{\partial R_{C3H9}} \\ + V(R_{C2H6}, R_{C2H7}, R_{C3H8}, R_{C3H9})$$

where,  $\mu$  is the reduced mass and  $\angle HCH$  is the angle between the two CH bonds bound to the same carbon (see Figure 2 for labeling of the atoms). As shown below in Tables S6 and S8-S10, the shifting in the peak positions induced by the intermode coupling is only  $\sim 20$   $\text{cm}^{-1}$  for DEE and  $\text{DEE}^+$  studied using B3LYP.

For the  $\text{DEE}^+$ , in order to quantify the effect of bending motion toward the bands in the 2500 to 3100  $\text{cm}^{-1}$  region, we also performed a 4D vibrational calculation using the normal mode (NM) coordinates give in Figure S3. Since the NM's have no coupling in the kinetic energy term, we solved the following Schrödinger equation:

$$\sum_{i=1}^4 -\frac{\hbar^2}{2m_i} \frac{\partial^2}{\partial Q_i^2} + V(Q_1, Q_2, \dots, Q_n),$$

where  $Q_i$ , and  $m_i$  are the NM coordinate and the mass for mode  $i$ . The NM Cartesian displacements are extracted from the Gaussian output by using the “freq=hpmodes” keyword. Similar to the case above we used DVR method to solve the vibrational Hamiltonian and the single point values required for the PES and DMF are obtained from B3LYP. As given in Figure S3, the bending modes have harmonic frequencies at the 1300 to 1500  $\text{cm}^{-1}$  range which is about half of the CH stretching modes at 2800 to 3000  $\text{cm}^{-1}$ . Therefore, one may speculate that Fermi resonance like coupling may cause large variations in the CH stretching peaks. However as given in Tables S8-S10, the peak position for the two CH stretching modes considered is only slightly red shifted from the inclusion of the bending motion. Furthermore, we also found that the HCH bending overtones are fairly weak in intensity signifying that the interaction with the strong CH stretching mode is not strong for the  $\text{DEE}^+$ . These studies show that the peak positions originates from the local nature of the CH bond and only slightly modified  $\sim 50$   $\text{cm}^{-1}$  shifts, by the coupling to the bending modes. As a conclusion, these studies confirm that using the local mode model will give the correct physics to explain the spectral features seen in the experiments.

Table S6: Theoretical peak position, in  $\text{cm}^{-1}$ , and intensity, in  $\text{km mol}^{-1}$ , of CH stretching vibration of neutral aa DEE calculated using the 4 dimensional local mode (LM-4D) and the local mode (LM) model with B3LYP/6-31++G(d,p).

| LM-4D         |           | LM            |           |
|---------------|-----------|---------------|-----------|
| Peak position | Intensity | Peak position | Intensity |
| 2852          | 14.3      | 2864          | 75        |
| 2866          | 126.2     | 2863          | 75        |
| 2875          | 1.1       | 2863          | 75        |
| 2878          | 141.6     | 2864          | 75        |

Table S7: Peak positions (in  $\text{cm}^{-1}$ ) and intensity (in  $\text{km mol}^{-1}$ ) for the 10 CH stretching normal mode for aaDES. They were calculated using the vibrational perturbation theory method with normal modes by the B3LYP/6-31++G(d,p) method.

| Assignment                     | Peak Position | Intensity |
|--------------------------------|---------------|-----------|
| CH <sub>2</sub> A <sub>1</sub> | 2933          | 81        |
| CH <sub>2</sub> A <sub>2</sub> | 2928          | 0         |
| CH <sub>2</sub> B <sub>1</sub> | 2923          | 30        |
| CH <sub>2</sub> B <sub>2</sub> | 2850          | 333       |
| CH <sub>3</sub> A <sub>1</sub> | 2962          | 53        |
| CH <sub>3</sub> A <sub>1</sub> | 2951          | 122       |
| CH <sub>3</sub> A <sub>2</sub> | 2973          | 0         |
| CH <sub>3</sub> B <sub>1</sub> | 2973          | 44        |
| CH <sub>3</sub> B <sub>2</sub> | 2962          | 10        |
| CH <sub>3</sub> B <sub>2</sub> | 2872          | 68        |

Table S8: Theoretical peak position, in  $\text{cm}^{-1}$ , and intensity, in  $\text{km mol}^{-1}$ , of CH stretching vibration of gg' DEE<sup>+</sup> calculated using the 4 dimensional normal mode (NM-4D), 4 dimensional local mode (LM-4D) and the local mode (LM) model with B3LYP/6-31++G(d,p).

| NM-4D         |           | LM-4D         |           | LM            |           |
|---------------|-----------|---------------|-----------|---------------|-----------|
| Peak position | Intensity | Peak position | Intensity | Peak position | Intensity |
| 2718          | 202.0     | 2765          | 172.9     | 2766          | 168.5     |
|               |           | 2939          | 20.1      | 2958          | 31.0      |
| 2965          | 1.1       | 2986          | 1.2       | 2982          | 3.4       |
|               |           | 3033          | 8.2       | 3013          | 0.5       |

Table S9: Theoretical peak position, in  $\text{cm}^{-1}$ , and intensity, in  $\text{km mol}^{-1}$ , of CH stretching vibration of gg DEE<sup>+</sup> calculated using the 4 dimensional normal mode (NM-4D), 4 dimensional local mode (LM-4D) and the local mode (LM) model with B3LYP/6-31++G(d,p).

| NM-4D         |           | LM-4D         |           | LM            |           |
|---------------|-----------|---------------|-----------|---------------|-----------|
| Peak position | Intensity | Peak position | Intensity | Peak position | Intensity |
|               |           | 2936          | 44.8      | 2955          | 30.3      |
| 2927          | 9.6       | 2939          | 2.5       | 2958          | 29.4      |
| 2989          | 20.5      | 3033          | 14.0      | 3015          | 0.7       |
|               |           | 3037          | 0.2       | 3015          | 0.7       |

Table S10: Theoretical peak position, in  $\text{cm}^{-1}$ , and intensity, in  $\text{km mol}^{-1}$ , of CH stretching vibration of sg DEE<sup>+</sup> calculated using the 4 dimensional normal mode (NM-4D), 4 dimensional local mode (LM-4D) and the local mode (LM) model with B3LYP/6-31++G(d,p).

| NM-4d          |           | LM-4D         |           | LM            |           |
|----------------|-----------|---------------|-----------|---------------|-----------|
| Peak positions | Intensity | Peak position | Intensity | Peak position | Intensity |

|      |       |      |       |      |       |
|------|-------|------|-------|------|-------|
| 2790 | 72.0  | 2798 | 99.4  | 2817 | 104.2 |
| 2816 | 159.0 | 2852 | 117.1 | 2836 | 110.9 |
|      |       | 2921 | 25.9  | 2930 | 38.5  |
|      |       | 3088 | 4.7   | 3062 | 0.6   |

Table S11: Relative energies, in eV, of the argon tagged complex of diethylether cation. See Figure S2 for the naming.

| Conformer | DE(eV) |
|-----------|--------|
| gg1       | 0.0000 |
| gg2       | 0.0086 |
| gg3       | 0.0127 |
| gg4       | 0.0157 |
| gg'1      | 0.0263 |
| gg'2      | 0.0332 |
| gg''1     | 0.0487 |
| gg''2     | 0.0571 |
| sg1       | 0.0502 |
| sg2       | 0.0602 |
| sg3       | 0.0610 |

## FIGURES

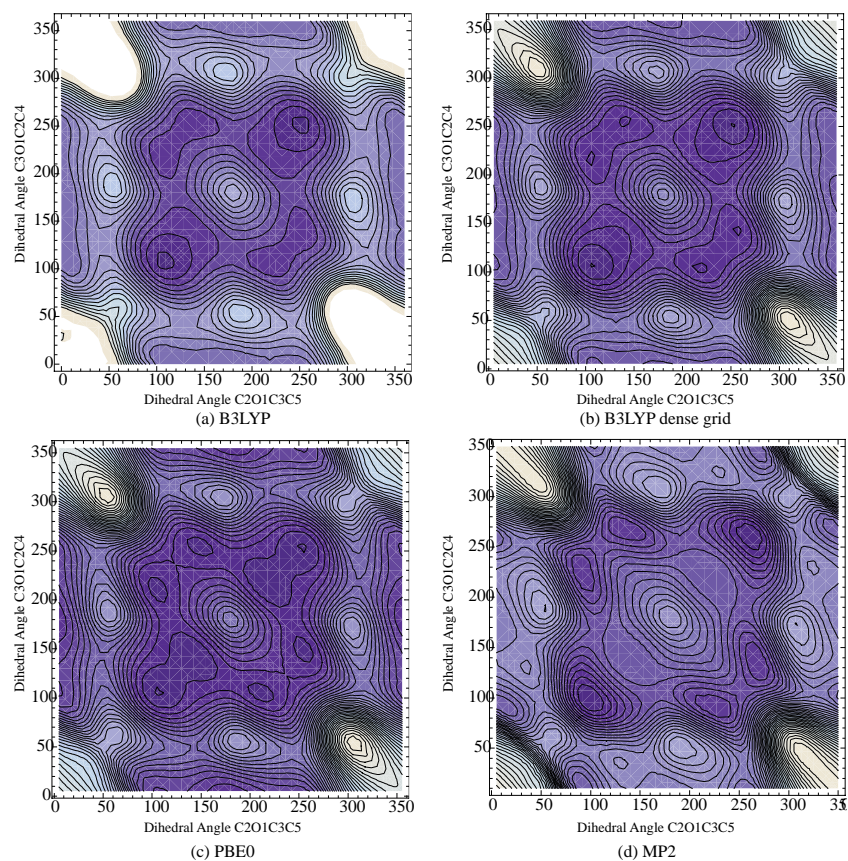

Figure S1: Two dimensional potential energy surface for the torsion motion of the ethyl group for DEE+ calculated using B3YP/6-31++G(d,p), (c) PBE0/6-31++G(d,p), and (d) MP2/6-311++G(3df,3pd). The quantum chemistry

calculation was done for each 10 degree grids. For (b) we obtained the results using a 5 degree grid. Each contour line corresponds to 0.01 eV and the darker the plot, the lower the energy.

As can be seen from the above Fig S1, using more points in the grid for the quantum chemistry calculation clarifies the minima locations, but the general trend is given by the calculation from 10 degree grids. Furthermore, the contour of the potential is similar for all methods. This gives us confidence in using B3LYP for the analysis in the manuscript.

To search for possible Ar-tagged DEE<sup>+</sup> conformers, we performed successive constraint optimization. First, fixing the DEE<sup>+</sup> geometry we placed the Ar atom on a 30 point sphere grid points around the central oxygen for 5 polar angles ( $\theta$ : 30, 60, 90, 120, 150) and 6 azimuthal angles ( $\phi$ : 0, 60, 120, 180, 240, 300) and optimized the OAr distance. Then using the obtained OAr bond distance as initial geometry we simultaneously optimized the OAr distance and the polar/azimuthal angles while keeping the DEE<sup>+</sup> geometry fixed. Lastly, using these previous Ar geometries as initial geometries we performed full optimization of the 1:1 complex. In Figure S2 we present the structure of the low energy argon bound complexes calculated by MP2 method. Though there are many positions which argon is bound, in most cases here the argon binds to the tip of the XH bond, as similar to the protonated water clusters. As can be seen from the relative energies given in Table S6, generally speaking the relative energy orderings is similar to the bare MP2 results  $gg < gg' < gg'' < sg$ , thus in the vibrational calculation section of the manuscript we concentrated on the two stable  $gg$  and  $gg'$  conformers.

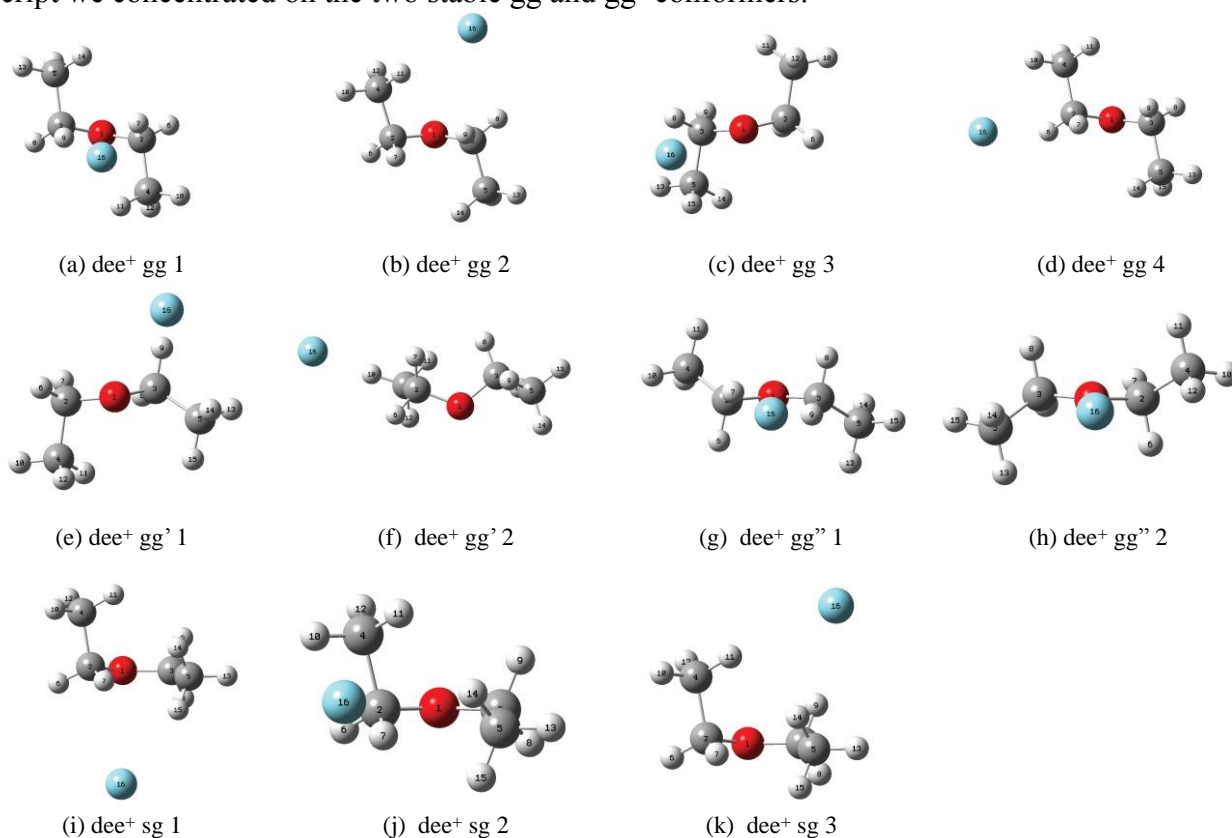

Figure S2: Schematic diagram of the argon bound diethylether cation cluster: (a-d)  $gg$  conformer, (e,f)  $gg'$  conformer, (g,h)  $gg''$  conformer, and (i-k)  $sg$  conformer.

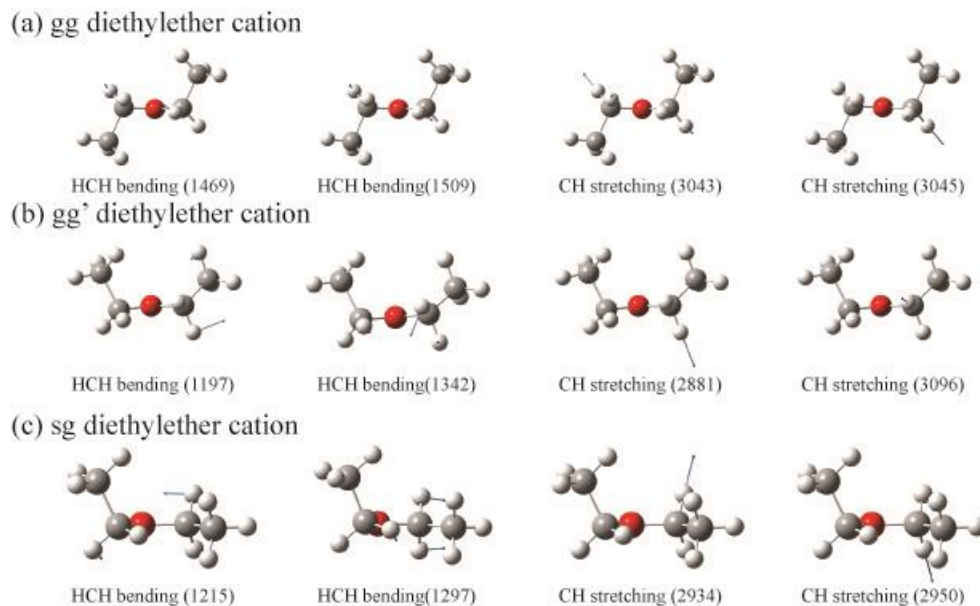

Figure S3: Schematic diagram of the HCH bending and CH stretching vibration that are considered in the present study for (a) gg (b) gg' and (c) sg diethyl ether cation. The harmonic frequencies, in  $\text{cm}^{-1}$ , are given in parenthesis.

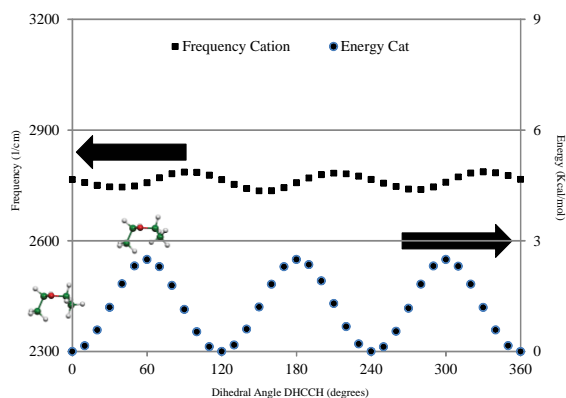

Figure S4: Methyl rotation dihedral angle dependence of the energy (circles), in kcal/mol, and C3H9 vibrational frequency (squares), in  $\text{cm}^{-1}$ , for diethylether cation. Calculated using B3LYP/6-31++G(d,p).

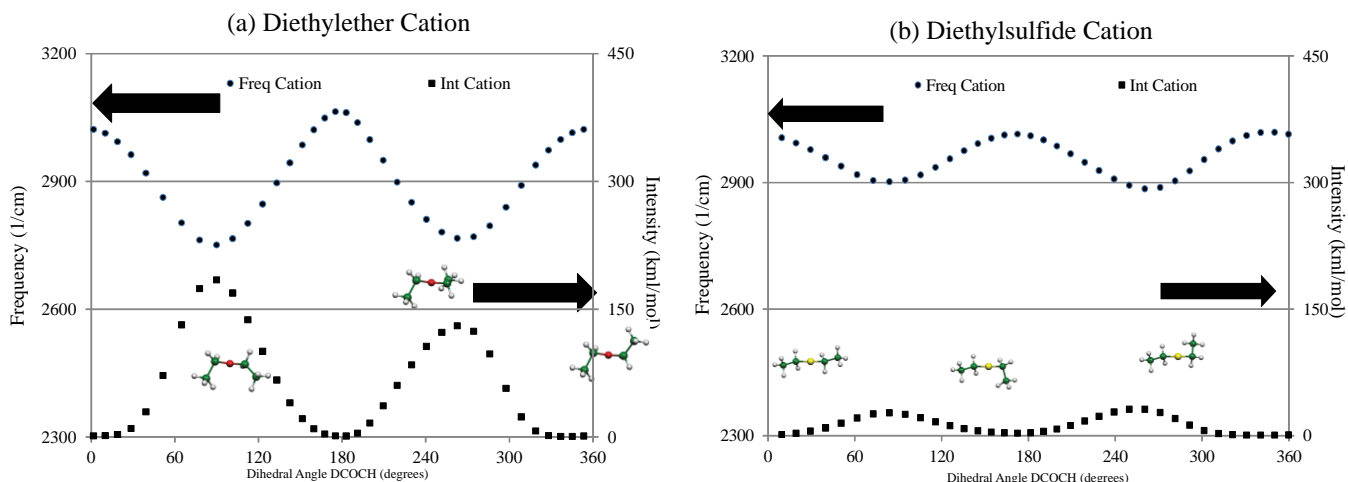



Figure S5: COCH dihedral angle dependence of the C3H9 vibrational frequency (circles), in  $\text{cm}^{-1}$ , and intensity (squares), in  $\text{km/mol}$ , for (a) diethylether cation and (b) diethylsulfide cation. Calculated using B3LYP/6-31++G(d,p).

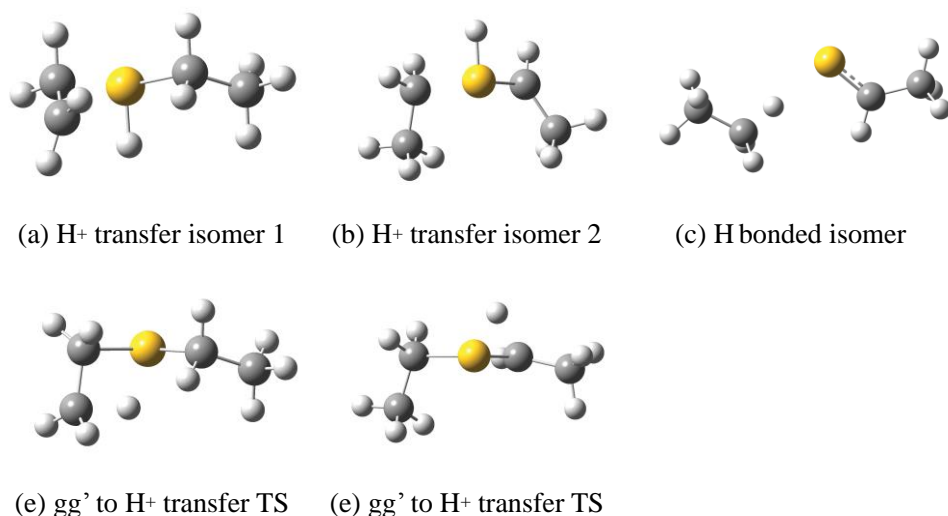

Figure S6: Schematic diagram of the (a) proton transfer isomer 1 of DES<sup>+</sup>, (b) proton transfer isomer 2 of DES<sup>+</sup>, (c) the hydrogen bonded complex, (d) the transition state connecting ag DES<sup>+</sup> to the proton transfer isomer 1 and (e) the transition state connecting ag DES<sup>+</sup> isomer to proton transfer isomer 2.

## XYZ geometries optimized using MP2/6-311++G(3df,3pd)

DEE aa Neutral

|   |         |         |         |
|---|---------|---------|---------|
| O | 0.0000  | 0.0000  | 0.2727  |
| C | 0.0000  | 1.1712  | -0.5175 |
| C | 0.0000  | -1.1712 | -0.5175 |
| C | 0.0000  | -2.3666 | 0.4058  |
| C | 0.0000  | 2.3666  | 0.4058  |
| H | -0.8849 | -1.1809 | -1.1653 |
| H | 0.8849  | -1.1809 | -1.1653 |
| H | 0.8849  | 1.1809  | -1.1653 |
| H | -0.8849 | 1.1809  | -1.1653 |
| H | 0.0000  | -3.2898 | -0.1712 |
| H | 0.8829  | -2.3517 | 1.0406  |
| H | -0.8829 | -2.3517 | 1.0406  |
| H | 0.0000  | 3.2898  | -0.1712 |
| H | -0.8829 | 2.3517  | 1.0406  |
| H | 0.8829  | 2.3517  | 1.0406  |

DEE ag Neutral

|   |         |         |         |
|---|---------|---------|---------|
| O | 0.0765  | -0.6001 | -0.3072 |
| C | -1.2452 | -0.6238 | 0.2000  |
| C | 0.9166  | 0.3215  | 0.3591  |
| C | 2.3227  | 0.1265  | -0.1586 |
| C | -2.0551 | 0.6088  | -0.1641 |
| H | 0.5868  | 1.3490  | 0.1776  |

|                 |         |         |         |
|-----------------|---------|---------|---------|
| H               | 0.8726  | 0.1423  | 1.4406  |
| H               | -1.7040 | -1.5109 | -0.2329 |
| H               | -1.2188 | -0.7537 | 1.2886  |
| H               | 3.0047  | 0.8216  | 0.3283  |
| H               | 2.6588  | -0.8893 | 0.0361  |
| H               | 2.3546  | 0.3016  | -1.2316 |
| H               | -3.0866 | 0.4812  | 0.1629  |
| H               | -1.6649 | 1.5057  | 0.3117  |
| H               | -2.0487 | 0.7551  | -1.2425 |
| DEE gg cation   |         |         |         |
| O               | 0.0000  | 0.0000  | 0.6047  |
| C               | 0.0000  | 1.2061  | -0.1071 |
| C               | 0.0000  | -1.2061 | -0.1071 |
| C               | -1.4846 | -1.6587 | -0.1205 |
| C               | 1.4846  | 1.6587  | -0.1205 |
| H               | 0.3748  | -1.0492 | -1.1163 |
| H               | 0.5928  | -1.9067 | 0.4756  |
| H               | -0.3748 | 1.0492  | -1.1163 |
| H               | -0.5928 | 1.9067  | 0.4756  |
| H               | -1.4846 | -2.6213 | -0.6283 |
| H               | -1.8559 | -1.7777 | 0.8916  |
| H               | -2.0951 | -0.9530 | -0.6752 |
| H               | 1.4846  | 2.6213  | -0.6283 |
| H               | 1.8559  | 1.7777  | 0.8916  |
| H               | 2.0951  | 0.9530  | -0.6752 |
| DEE gg' cation  |         |         |         |
| O               | -0.0262 | -0.5654 | -0.4948 |
| C               | -1.3162 | -0.6185 | 0.0201  |
| C               | 1.0768  | -0.4651 | 0.3926  |
| C               | 2.0281  | 0.6031  | -0.1121 |
| C               | -1.7733 | 0.8744  | 0.0804  |
| H               | 0.7134  | -0.3216 | 1.4083  |
| H               | 1.5356  | -1.4616 | 0.2971  |
| H               | -1.9214 | -1.1556 | -0.7045 |
| H               | -1.3161 | -1.0577 | 1.0155  |
| H               | 2.9025  | 0.5917  | 0.5348  |
| H               | 2.3399  | 0.3937  | -1.1308 |
| H               | 1.5665  | 1.5848  | -0.0595 |
| H               | -2.8039 | 0.8318  | 0.4272  |
| H               | -1.1682 | 1.4292  | 0.7903  |
| H               | -1.7311 | 1.3241  | -0.9054 |
| DEE gg'' cation |         |         |         |
| O               | 0.0000  | -0.2715 | -0.0012 |
| C               | 1.1803  | 0.4400  | -0.3264 |
| C               | 2.3914  | -0.3278 | 0.1511  |
| C               | -1.1800 | 0.4393  | 0.3268  |
| C               | -2.3917 | -0.3274 | -0.1506 |

|   |         |         |         |
|---|---------|---------|---------|
| H | 1.1272  | 0.4496  | -1.4306 |
| H | 1.0933  | 1.4637  | 0.0364  |
| H | -1.1254 | 0.4470  | 1.4310  |
| H | -1.0933 | 1.4637  | -0.0341 |
| H | 3.2752  | 0.2015  | -0.1975 |
| H | 2.4158  | -0.3669 | 1.2362  |
| H | 2.3999  | -1.3339 | -0.2570 |
| H | -2.4175 | -0.3644 | -1.2358 |
| H | -2.3999 | -1.3343 | 0.2555  |
| H | -3.2751 | 0.2013  | 0.2000  |

DEE sg cation

|   |         |         |         |
|---|---------|---------|---------|
| O | -0.0512 | -0.1195 | 0.0164  |
| C | -0.0312 | -0.0986 | 1.3972  |
| C | 1.1289  | 0.0182  | -0.7692 |
| C | -0.2493 | 1.4132  | 1.7646  |
| C | 2.4497  | -0.0953 | -0.0653 |
| H | -0.9009 | -0.6613 | 1.7269  |
| H | 0.9104  | -0.4571 | 1.7988  |
| H | 0.9689  | -0.7278 | -1.5557 |
| H | 0.9646  | 0.9880  | -1.2626 |
| H | -0.2963 | 1.4233  | 2.8515  |
| H | 0.5888  | 2.0096  | 1.4199  |
| H | -1.1829 | 1.7693  | 1.3442  |
| H | 3.2199  | 0.0242  | -0.8253 |
| H | 2.5978  | 0.6849  | 0.6769  |
| H | 2.5855  | -1.0743 | 0.3886  |

DEE cation H<sup>+</sup> transfer1

|   |         |         |         |
|---|---------|---------|---------|
| O | -0.0243 | -0.0189 | 1.5521  |
| C | -0.0037 | -0.0745 | 0.0229  |
| C | 1.3054  | 0.0170  | 2.2527  |
| C | 1.9988  | -1.2973 | 2.0489  |
| C | 1.8465  | 0.8683  | 1.8460  |
| H | -0.5751 | 0.7356  | 1.8242  |
| H | -1.3429 | 0.2711  | -0.4671 |
| H | 0.7748  | 0.6176  | -0.2848 |
| H | 0.2777  | -1.1043 | -0.1653 |
| H | 2.9027  | -1.2841 | 2.6560  |
| H | 1.3773  | -2.1239 | 2.3830  |
| H | 2.3021  | -1.4503 | 1.0170  |
| H | 1.0331  | 0.1921  | 3.2889  |
| H | -1.5252 | 1.2310  | -0.9193 |
| H | -2.1428 | -0.4470 | -0.3993 |

DEE cation H<sup>+</sup> transfer2

|   |        |        |        |
|---|--------|--------|--------|
| O | 0.0000 | 0.0000 | 1.5197 |
| C | 0.0000 | 0.0000 | 0.0000 |

|   |         |         |         |
|---|---------|---------|---------|
| C | 1.2810  | 0.0000  | 2.1917  |
| C | 1.1868  | 0.2892  | 3.6314  |
| C | 1.9126  | -0.7519 | 1.7489  |
| H | -0.5602 | 0.7117  | 1.8744  |
| H | 0.3120  | -1.3839 | -0.4803 |
| H | -1.0111 | 0.3140  | -0.2389 |
| H | 0.7253  | 0.7546  | -0.2889 |
| H | 2.1939  | 0.3439  | 4.0364  |
| H | 0.6962  | 1.2439  | 3.8237  |
| H | 0.6481  | -0.4992 | 4.1636  |
| H | 0.2262  | -1.3696 | -1.5663 |
| H | 1.3257  | -1.6899 | -0.2389 |
| H | -0.3998 | -2.1062 | -0.0910 |

DEE cation H bonded1

|   |         |         |         |
|---|---------|---------|---------|
| O | 0.0000  | 0.0000  | 2.7551  |
| C | 0.0000  | 0.0000  | 0.0000  |
| C | 1.1394  | 0.0000  | 3.2719  |
| C | 1.3046  | -0.0001 | 4.7175  |
| C | 2.0062  | 0.0001  | 2.6093  |
| H | 0.0237  | 0.0001  | 1.7162  |
| H | -1.4744 | 0.0000  | -0.1838 |
| H | 0.5513  | 0.9191  | -0.1585 |
| H | 0.5513  | -0.9191 | -0.1584 |
| H | 1.9103  | 0.8701  | 4.9860  |
| H | 0.3557  | -0.0002 | 5.2412  |
| H | 1.9104  | -0.8703 | 4.9859  |
| H | -1.6841 | -0.0001 | -1.2602 |
| H | -1.9454 | -0.8902 | 0.2263  |
| H | -1.9454 | 0.8902  | 0.2262  |

DEE cation OH TS1

|   |         |         |         |
|---|---------|---------|---------|
| O | -0.0236 | 0.0973  | 1.5067  |
| C | 0.0147  | 0.0407  | 0.0343  |
| C | 1.2827  | 0.0024  | 2.1751  |
| C | 1.0538  | -0.2908 | 3.6288  |
| C | 1.8713  | -0.7594 | 1.6629  |
| H | 1.7260  | 0.9835  | 1.9951  |
| H | -0.5040 | -1.3601 | 0.1215  |
| H | -0.6715 | 0.7865  | -0.3459 |
| H | 1.0265  | 0.1686  | -0.3319 |
| H | 2.0177  | -0.2903 | 4.1345  |
| H | 0.4257  | 0.4695  | 4.0846  |
| H | 0.6007  | -1.2702 | 3.7684  |
| H | -1.5459 | -1.5402 | -0.1228 |
| H | 0.2132  | -2.1696 | 0.0438  |
| H | -0.5821 | -1.1951 | 1.3750  |

DEE cation OH TS2

|   |         |         |         |
|---|---------|---------|---------|
| O | 0.0000  | 0.0000  | 1.4970  |
| C | 0.0000  | 0.0000  | 0.0000  |
| C | 1.2945  | 0.0000  | 2.1243  |
| C | 1.3456  | -0.5805 | 3.4753  |
| C | 2.1219  | 0.0079  | 1.4244  |
| H | 0.4760  | 1.0081  | 1.9808  |
| H | 0.2261  | -1.4146 | -0.4517 |
| H | -0.9837 | 0.3854  | -0.2438 |
| H | 0.7740  | 0.6940  | -0.3235 |
| H | 2.2312  | -0.2161 | 3.9903  |
| H | 0.4543  | -0.3461 | 4.0510  |
| H | 1.4275  | -1.6674 | 3.3804  |
| H | 0.1871  | -1.4282 | -1.5399 |
| H | 1.2041  | -1.7840 | -0.1493 |
| H | -0.5498 | -2.0740 | -0.0726 |

DES aa netral

|   |         |         |         |
|---|---------|---------|---------|
| S | 0.0000  | 0.0000  | 0.5484  |
| C | 0.0000  | -1.3747 | -0.6205 |
| C | 0.0000  | 1.3747  | -0.6205 |
| C | 0.0000  | -2.6910 | 0.1414  |
| C | 0.0000  | 2.6910  | 0.1414  |
| H | -0.8842 | -1.2981 | -1.2542 |
| H | 0.8842  | -1.2981 | -1.2542 |
| H | 0.8842  | 1.2981  | -1.2542 |
| H | -0.8842 | 1.2981  | -1.2542 |
| H | 0.0000  | -3.5298 | -0.5527 |
| H | 0.8821  | -2.7702 | 0.7743  |
| H | -0.8821 | -2.7702 | 0.7743  |
| H | 0.0000  | 3.5298  | -0.5527 |
| H | -0.8821 | 2.7702  | 0.7743  |
| H | 0.8821  | 2.7702  | 0.7743  |

DES ag netral

|   |         |         |         |
|---|---------|---------|---------|
| S | 0.0704  | -0.8372 | -0.2024 |
| C | -1.5357 | -0.3404 | 0.4541  |
| C | 1.0631  | 0.5926  | 0.2755  |
| C | -2.1828 | 0.8177  | -0.2897 |
| C | 2.5190  | 0.3277  | -0.0784 |
| H | -2.1568 | -1.2332 | 0.3822  |
| H | -1.4190 | -0.1109 | 1.5143  |
| H | 0.7062  | 1.4809  | -0.2438 |
| H | 0.9509  | 0.7509  | 1.3491  |
| H | -3.1628 | 1.0401  | 0.1331  |
| H | -1.5780 | 1.7196  | -0.2181 |
| H | -2.3050 | 0.5734  | -1.3429 |
| H | 3.1355  | 1.1822  | 0.1957  |

|               |         |         |         |
|---------------|---------|---------|---------|
| H             | 2.8910  | -0.5490 | 0.4482  |
| H             | 2.6306  | 0.1561  | -1.1477 |
| DES aa cation |         |         |         |
| S             | 0.0000  | 0.0000  | 0.4978  |
| C             | 0.0000  | 1.4029  | -0.6056 |
| C             | 0.0000  | -1.4029 | -0.6056 |
| C             | 0.0005  | 2.7075  | 0.1770  |
| C             | -0.0005 | -2.7075 | 0.1770  |
| H             | 0.8829  | 1.2853  | -1.2402 |
| H             | -0.8834 | 1.2856  | -1.2396 |
| H             | -0.8829 | -1.2853 | -1.2402 |
| H             | 0.8834  | -1.2856 | -1.2396 |
| H             | 0.0004  | 3.5315  | -0.5320 |
| H             | -0.8854 | 2.7955  | 0.8009  |
| H             | 0.8869  | 2.7952  | 0.8003  |
| H             | -0.0004 | -3.5315 | -0.5320 |
| H             | 0.8854  | -2.7955 | 0.8009  |
| H             | -0.8869 | -2.7952 | 0.8003  |
| DES ag cation |         |         |         |
| S             | -0.0281 | -0.7621 | -0.2518 |
| C             | -1.1567 | 0.4045  | 0.4888  |
| C             | 1.5398  | -0.3256 | 0.4779  |
| C             | -2.5128 | 0.3666  | -0.1984 |
| C             | 2.1824  | 0.8181  | -0.3214 |
| H             | -1.2094 | 0.1156  | 1.5438  |
| H             | -0.6717 | 1.3820  | 0.4363  |
| H             | 1.3600  | -0.0501 | 1.5165  |
| H             | 2.1465  | -1.2285 | 0.4317  |
| H             | -3.1711 | 1.0707  | 0.3044  |
| H             | -2.4355 | 0.6579  | -1.2428 |
| H             | -2.9615 | -0.6218 | -0.1355 |
| H             | 3.1469  | 1.0291  | 0.1350  |
| H             | 2.3469  | 0.5343  | -1.3576 |
| H             | 1.5815  | 1.7230  | -0.2847 |
| DES gg cation |         |         |         |
| S             | -0.0262 | 0.0000  | -0.0202 |
| C             | 0.0063  | -0.0361 | 1.7620  |
| C             | 1.7055  | 0.0361  | -0.4426 |
| C             | 0.1269  | 1.3966  | 2.3032  |
| C             | 2.2596  | -1.3966 | -0.4638 |
| H             | -0.9308 | -0.4979 | 2.0677  |
| H             | 0.8456  | -0.6602 | 2.0667  |
| H             | 1.7625  | 0.4979  | -1.4267 |
| H             | 2.2140  | 0.6602  | 0.2915  |
| H             | 0.1231  | 1.3331  | 3.3891  |
| H             | 1.0547  | 1.8697  | 1.9915  |

|   |         |         |         |
|---|---------|---------|---------|
| H | -0.7140 | 2.0100  | 1.9906  |
| H | 3.3087  | -1.3331 | -0.7440 |
| H | 2.1944  | -1.8697 | 0.5128  |
| H | 1.7431  | -2.0100 | -1.1974 |

DES cation H<sup>+</sup> transfer1

|   |         |         |         |
|---|---------|---------|---------|
| S | 0.0134  | -0.8387 | 0.0828  |
| C | 1.0512  | 0.5646  | -0.3858 |
| C | -1.7090 | -0.2897 | -0.3113 |
| C | 2.4542  | 0.3631  | 0.1667  |
| C | -2.0740 | 1.0052  | 0.2797  |
| H | 1.0349  | 0.5580  | -1.4754 |
| H | 0.5751  | 1.4700  | -0.0175 |
| H | -2.3106 | -1.1222 | 0.0532  |
| H | -1.7213 | -0.2984 | -1.4004 |
| H | 3.0724  | 1.1943  | -0.1644 |
| H | 2.4564  | 0.3561  | 1.2548  |
| H | 2.9002  | -0.5591 | -0.1979 |
| H | -1.9834 | 1.9141  | -0.2900 |
| H | -2.4301 | 1.0524  | 1.2957  |
| H | -0.0207 | -0.6194 | 1.4059  |

DES cation H<sup>+</sup> transfer2

|   |         |         |         |
|---|---------|---------|---------|
| S | -0.0069 | -0.9536 | -0.3414 |
| C | -1.5432 | -0.2491 | 0.3545  |
| C | 1.2963  | -0.1869 | 0.5115  |
| C | 2.0239  | 0.9346  | -0.1223 |
| C | -1.6754 | 1.1945  | -0.0945 |
| H | 1.4845  | -0.5189 | 1.5217  |
| H | -0.0308 | -2.1349 | 0.2948  |
| H | -2.3286 | -0.8874 | -0.0517 |
| H | -1.4935 | -0.3609 | 1.4348  |
| H | 3.0977  | 0.7461  | -0.0755 |
| H | 1.7401  | 1.0821  | -1.1611 |
| H | 1.8447  | 1.8619  | 0.4271  |
| H | -2.6156 | 1.5846  | 0.2884  |
| H | -0.8721 | 1.8110  | 0.3025  |
| H | -1.6903 | 1.2761  | -1.1792 |

DES cation H bonded

|   |         |         |         |
|---|---------|---------|---------|
| S | 1.0448  | 1.1502  | 0.0001  |
| C | -2.0233 | -0.3073 | -0.0003 |
| C | 1.3375  | -0.4257 | -0.0018 |
| C | 2.6676  | -1.0601 | 0.0011  |
| C | -3.5439 | -0.2101 | 0.0007  |
| H | 0.4476  | -1.0609 | -0.0054 |

|   |         |         |         |
|---|---------|---------|---------|
| H | -1.5846 | 0.6965  | -0.0223 |
| H | -1.6710 | -0.8519 | -0.8781 |
| H | -1.6680 | -0.8153 | 0.8980  |
| H | 2.7169  | -1.7150 | -0.8736 |
| H | 3.4906  | -0.3549 | 0.0047  |
| H | 2.7117  | -1.7179 | 0.8739  |
| H | -3.9893 | -1.2016 | 0.0221  |
| H | -3.8976 | 0.3370  | 0.8707  |
| H | -3.9009 | 0.3005  | -0.8899 |

DES cation SH TS1

|   |         |         |         |
|---|---------|---------|---------|
| S | 0.0833  | -0.7191 | -0.3467 |
| C | -1.1450 | 0.1835  | 0.6327  |
| C | 1.6416  | -0.3292 | 0.5590  |
| C | -2.4036 | 0.3773  | -0.1977 |
| C | 1.9019  | 0.9112  | -0.2392 |
| H | -1.3180 | -0.4403 | 1.5092  |
| H | -0.6954 | 1.1255  | 0.9430  |
| H | 2.3413  | -1.1432 | 0.3997  |
| H | 1.4263  | -0.1924 | 1.6144  |
| H | -3.1470 | 0.8772  | 0.4190  |
| H | -2.2122 | 0.9976  | -1.0705 |
| H | -2.8173 | -0.5752 | -0.5211 |
| H | 1.6183  | 1.8696  | 0.1741  |
| H | 2.6735  | 0.8883  | -0.9974 |
| H | 0.6736  | 0.4943  | -1.0401 |

DES cation SH TS2

|   |         |         |         |
|---|---------|---------|---------|
| S | 0.0191  | -0.8029 | -0.2780 |
| C | -1.5568 | -0.3068 | 0.4703  |
| C | 1.1469  | 0.3948  | 0.4296  |
| C | 2.5085  | 0.4902  | -0.1457 |
| C | -2.1248 | 0.8904  | -0.2753 |
| H | 0.6864  | 1.1398  | 1.0642  |
| H | 0.8087  | -1.0100 | 0.9006  |
| H | -2.1877 | -1.1897 | 0.3815  |
| H | -1.3719 | -0.1093 | 1.5249  |
| H | 3.1996  | 0.8744  | 0.6004  |
| H | 2.8704  | -0.4723 | -0.5044 |
| H | 2.4986  | 1.1801  | -0.9943 |
| H | -3.0816 | 1.1491  | 0.1730  |
| H | -1.4717 | 1.7574  | -0.2018 |
| H | -2.2933 | 0.6601  | -1.3248 |
